# Supplementary material for: Silica-coated gradient alloy quantum dots with high luminescence for converter materials in white light-emitting diodes
Source: Royal Society of Chemistry journal article supplement (doi:10.1039/c5ra24203g), 2015-01-01
Supplement: c5ra24203g1.pdf [file c5ra24203g1.pdf]

## Silica-Coated Gradient Alloy Quantum Dots with High luminescence for Converter Materials in White Light-Emitting Diodes

Hak-Sung Jung,<sup>‡,a,e</sup> Young-Jae Kim,<sup>‡,a,b</sup> Junsang Cho,<sup>a,c</sup> Tae-Jong Yoon,<sup>\*,d</sup> and Jin-Kyu Lee<sup>\*,a</sup>

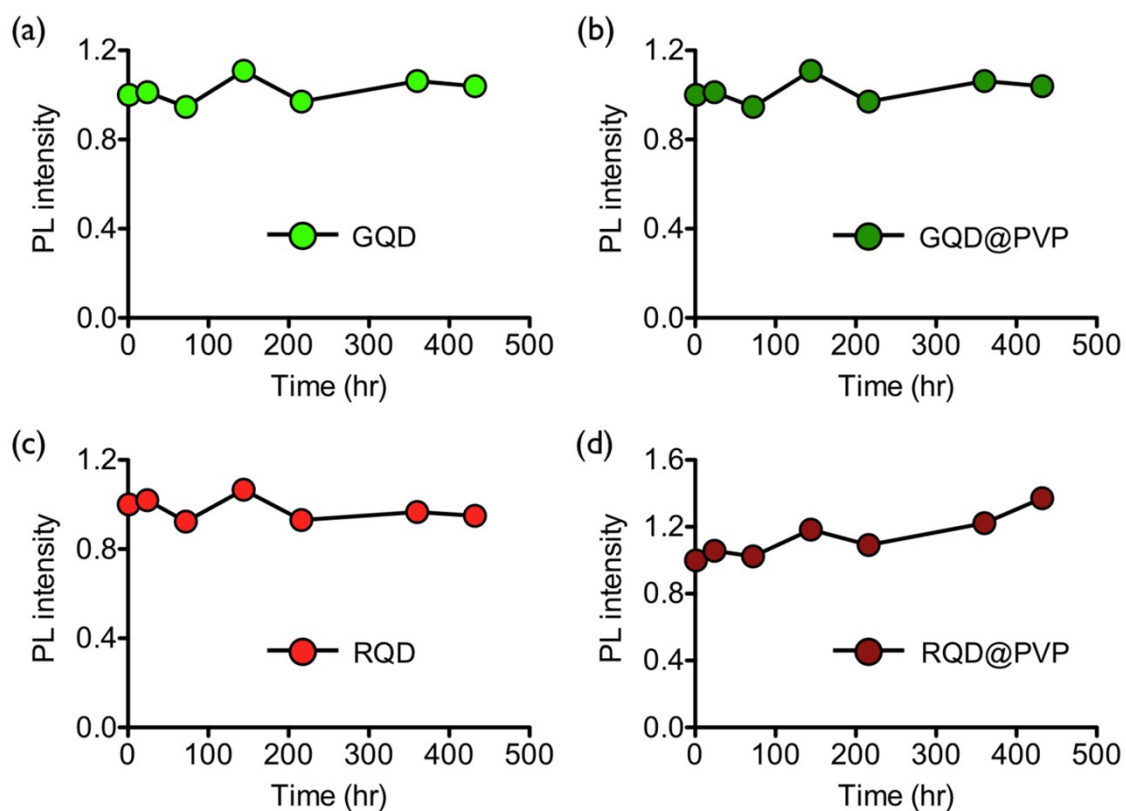

**Fig. S1** PL intensities of the QDs and QD@PVP were determined after dispersing in chloroform as times. The intensities were normalized at 540 nm (GQD and GQD@PVP) and 620 nm (RQD and RQD@PVP).

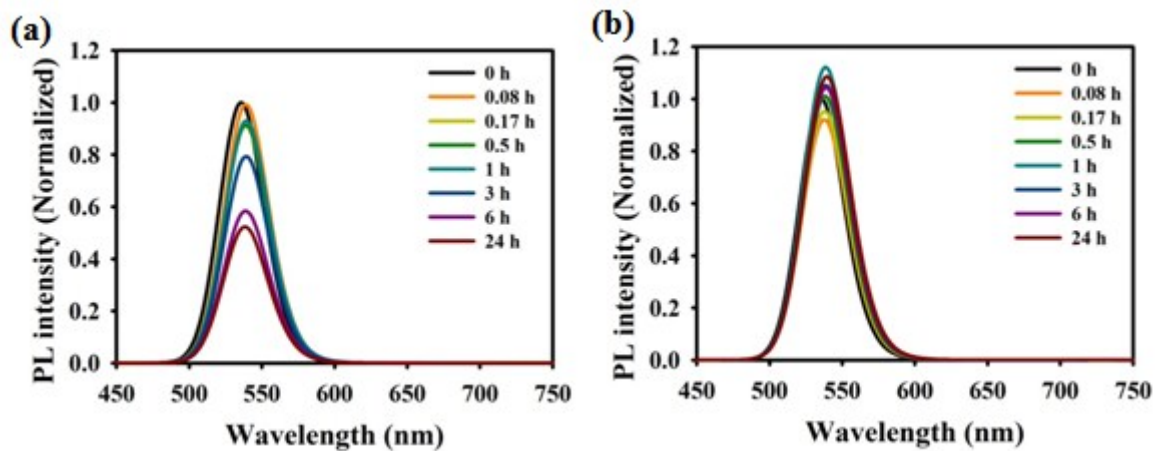

**Fig. S2** PL spectra of the prepared GQD@PVP in ethanol with different base catalyst ( $\text{NH}_4\text{OH}$ : a, DMA: b) were determined as times.

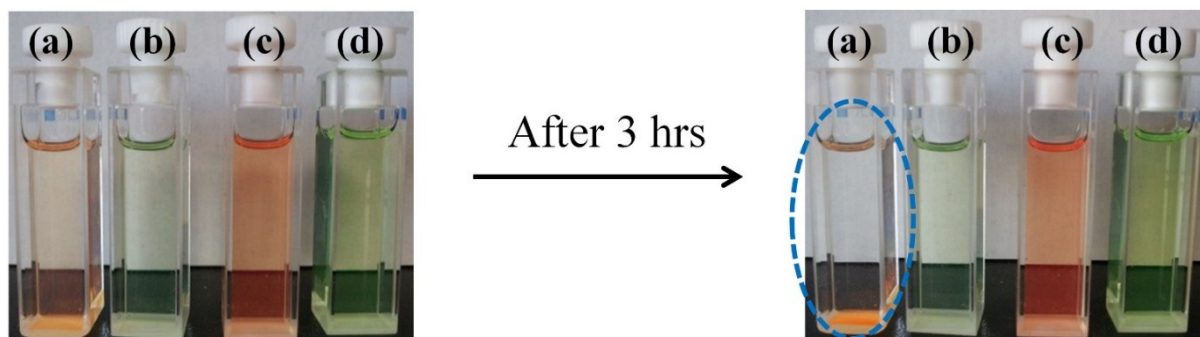

**Fig. S3** RQD@PVP (a and c) and GQD@PVP (b and d) particle dispersed in ethanol with different base catalysts. ( $\text{NH}_4\text{OH}$ : a and b, DMA: c and d). The particle solution with DMA base were revealed higher solubility then  $\text{NH}_4\text{OH}$  contained solution. Especially, RQD@PVP solution with  $\text{NH}_4\text{OH}$  was completely precipitated within 3 hr.

**Table S1** Quantum yields of QD solutions.

| Sample               | Solvent           | Quantum yield (%) |
|----------------------|-------------------|-------------------|
| GQD                  | Hexane            | 46.3              |
| GQD@PVP              | CHCl <sub>3</sub> | 48.3              |
| GQD@SiO <sub>2</sub> | EtOH              | 47.7              |
| RQD                  | Hexane            | 55.9              |
| RQD@PVP              | CHCl <sub>3</sub> | 37.7              |
| RQD@SiO <sub>2</sub> | EtOH              | 32.1              |

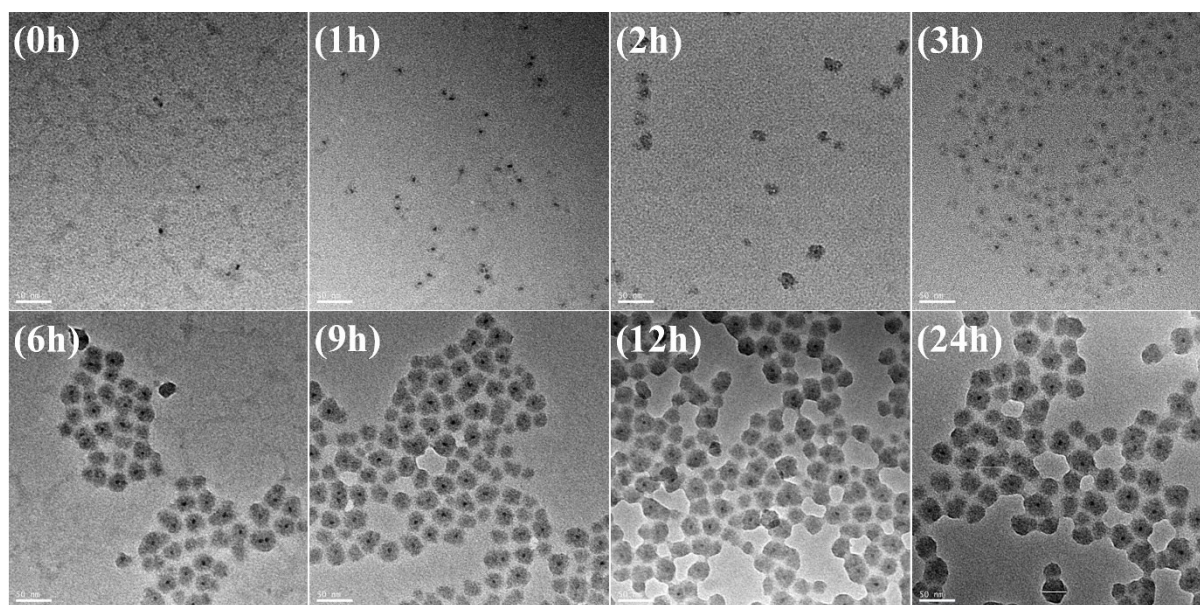

**Fig. S4** TEM images for GQD@SiO<sub>2</sub> nanoparticle with different reaction times. (Scale bar: 50 nm)

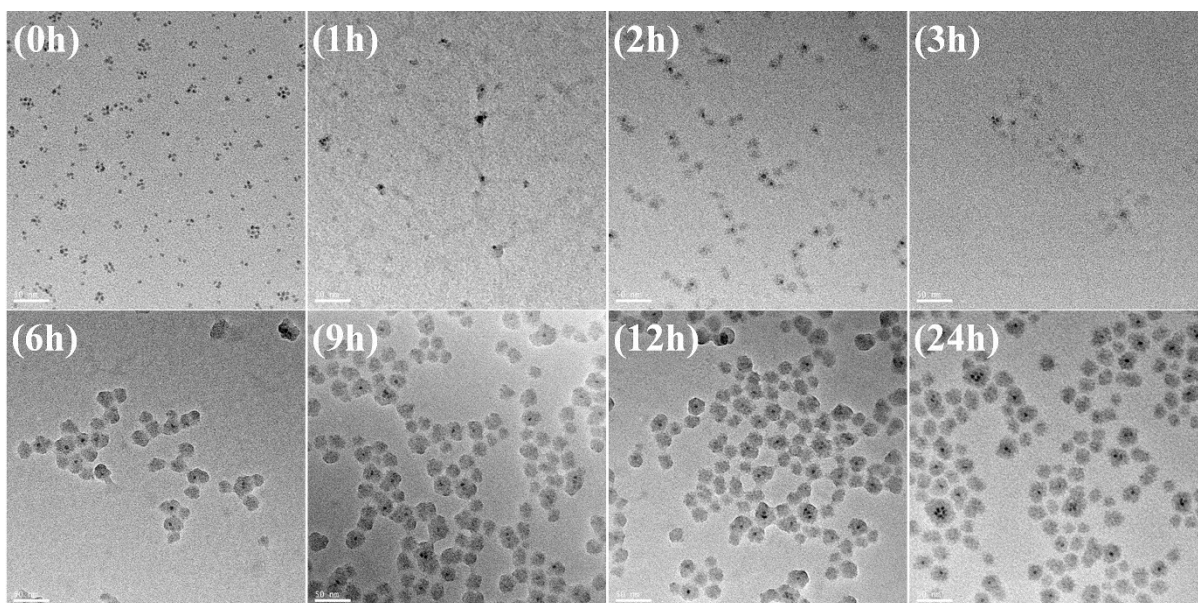

**Fig. S5** TEM images for RQD@SiO<sub>2</sub> nanoparticle with different reaction times. (Scale bar: 50 nm)

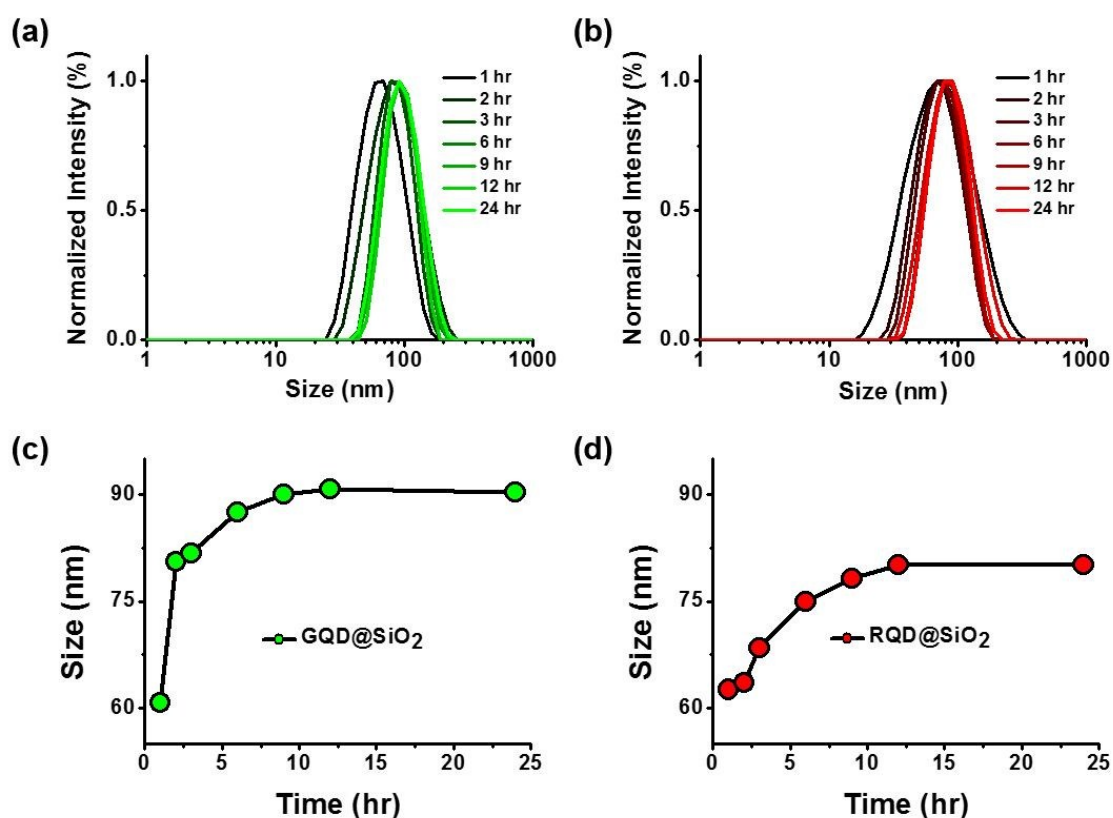

**Fig. S6** Size distribution and average size of GQD@SiO<sub>2</sub> (a and c) and RQD@SiO<sub>2</sub> (b and d) in EtOH as function of the reaction time measured by DLS.

**Table S2** Monitoring of size of QD@SiO<sub>2</sub> nanoparticles in ethanol solution as the reaction times by DLS.

| Time (hr)      |                      | 1        | 2        | 3        | 6        | 9        | 12       | 24       |
|----------------|----------------------|----------|----------|----------|----------|----------|----------|----------|
| Mean size (nm) | GQD@SiO <sub>2</sub> | 60.8±0.9 | 80.6±1.0 | 81.8±0.3 | 87.5±1.0 | 90.0±0.3 | 90.7±0.9 | 90.3±0.6 |
|                | RQD@SiO <sub>2</sub> | 62.6±0.9 | 63.6±0.6 | 68.5±0.3 | 75.0±0.6 | 78.2±0.4 | 80.1±1.0 | 80.1±0.2 |

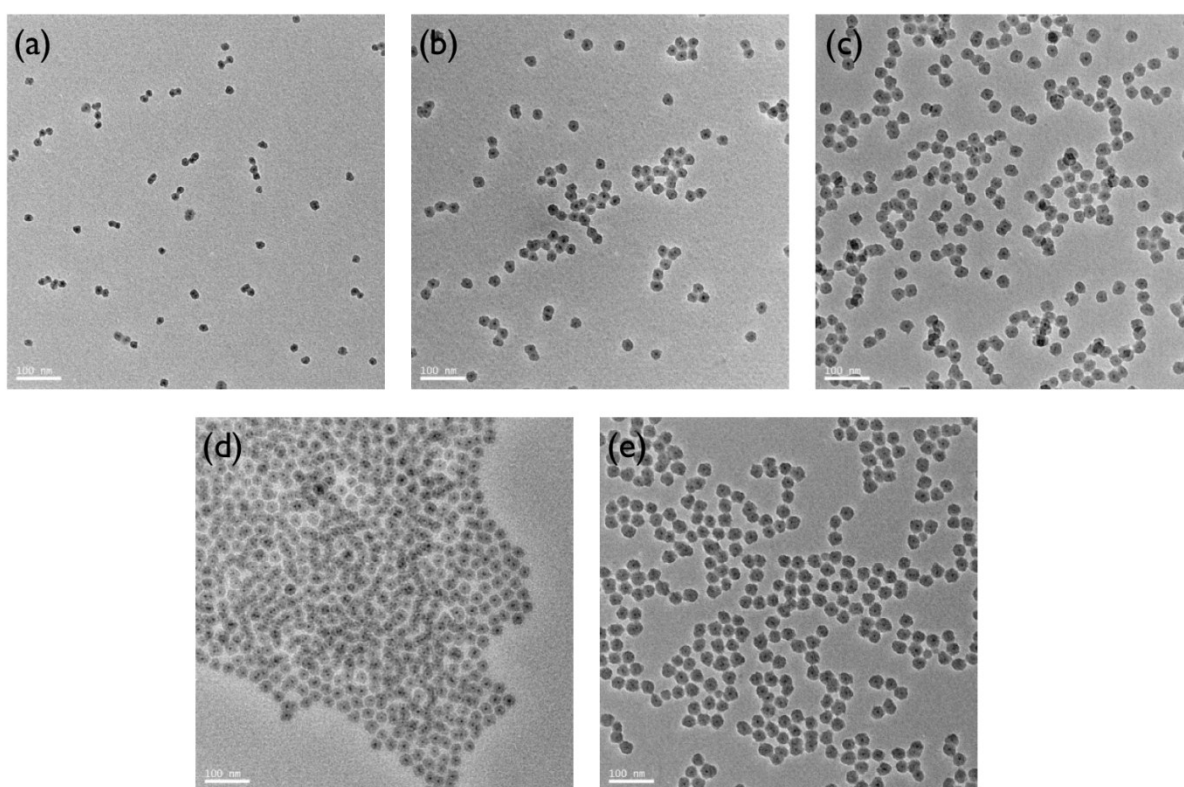

**Fig. S7** Low magnification TEM images for gradient alloy GQD@SiO<sub>2</sub> nanoparticle with different shell thickness (a: 4.3, b: 7.0, c: 9.6, d: 11 and e: 14 nm for silica shell thickness). The thickness of silica shell was proportion to the increasing of TEOS concentration.

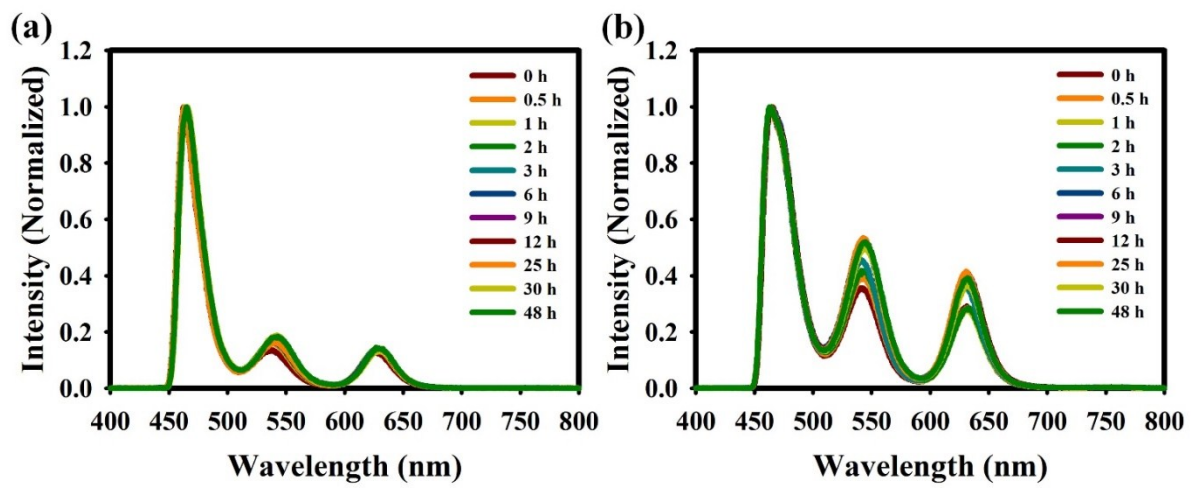

**Fig. S8** PL spectra of QD@SiO<sub>2</sub>-based WLED that operating power was for 0.5 W (a) and 1 W (b).
